# Supplementary material for: Clinical meaning of the GRADE rules
Source: Springer Nature journal article supplement (doi:10.1007/s00134-014-3273-0), 2014-03-25
Supplement: MOESM1 [file 8123092]

**Appendix. Summary of GRADE Terminology.**

**CPG** – Clinical Practice Guidelines

**GRADE** – Grading of Recommendations Assessment, Development and Evaluation

**PIC**O – way of phrasing clinical questions which requires specification of Population, Intervention, Comparator, and Outcome (how is effect measured)

**QoE** – Quality of Evidence (confidence, certainty, trust in the data), divided into high (A), moderate (B), low (C), very low (D)

**High QoE** - We are very confident that the true effect lies close to that of the estimate of the effect

**Moderate QoE** - We are moderately confident in the effect estimate: The true effect is likely to be close to the estimate of the effect, but there is a possibility that it is substantially different

**Low QoE** - Our confidence in the effect estimate is limited: The true effect may be substantially different from the estimate of the effect

**Very Low QoE** - We have very little confidence in the effect estimate: The true effect is likely to be substantially different from the estimate of effect

**Strength of Recommendation** – based on a balance between positive and negative effects how strongly should one consider a specific intervention or diagnostic test

**Strong Recommendation (“We Recommend”)** – this recommendation should be followed for most patients and if not followed explicit reasoning should follow

**Weak Recommendation (“We Suggest”)** – consider this recommendation however its balance of benefit compared to harm is not definite

**Inconsistency** – heterogeneity in evidence informing a recommendation

**Imprecision** – wide confidence intervals in estimate of effect informing recommendation for an intervention

**Indirectness –** the evidence informing a recommendation is not corresponding exactly to the question asked (either different Population [for example, we have data from adults, we are interested in pediatrics], or Intervention [dose of drug different], or Comparator [we would like to see it compared not to placebo but to less expensive alternative] or Outcome [we are interested in mortality, we have hemodynamic data].
